# Supplementary material for: Removal of Antibiotics and Nutrients by Vetiver Grass (Chrysopogon zizanioides) from a Plug Flow Reactor Based Constructed Wetland Model
Source: MDPI journal article supplement (doi:10.3390/toxics9040084), 2021-04-15
Supplement: s1 [file s1]

# Supplementary Materials: Removal of Antibiotics and Nutrients by Vetiver Grass (*Chrysopogon zizanioides*) from a Plug Flow Reactor Based Constructed Wetland Model

Saumik Panja <sup>1</sup>, Dibyendu Sarkar <sup>1,\*</sup>, Zhiming Zhang <sup>1</sup> and Rupali Datta <sup>2</sup>

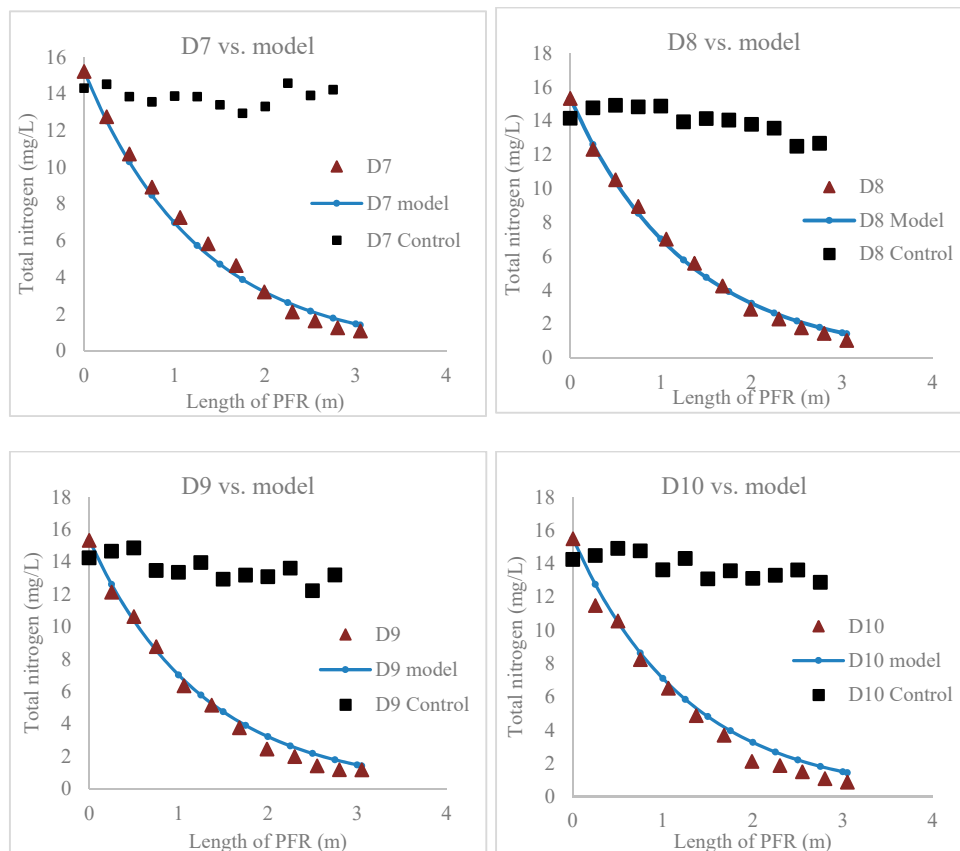

**Figure S1.** Removal of total nitrogen content according to predicted and experimental data from day 7 to 10.

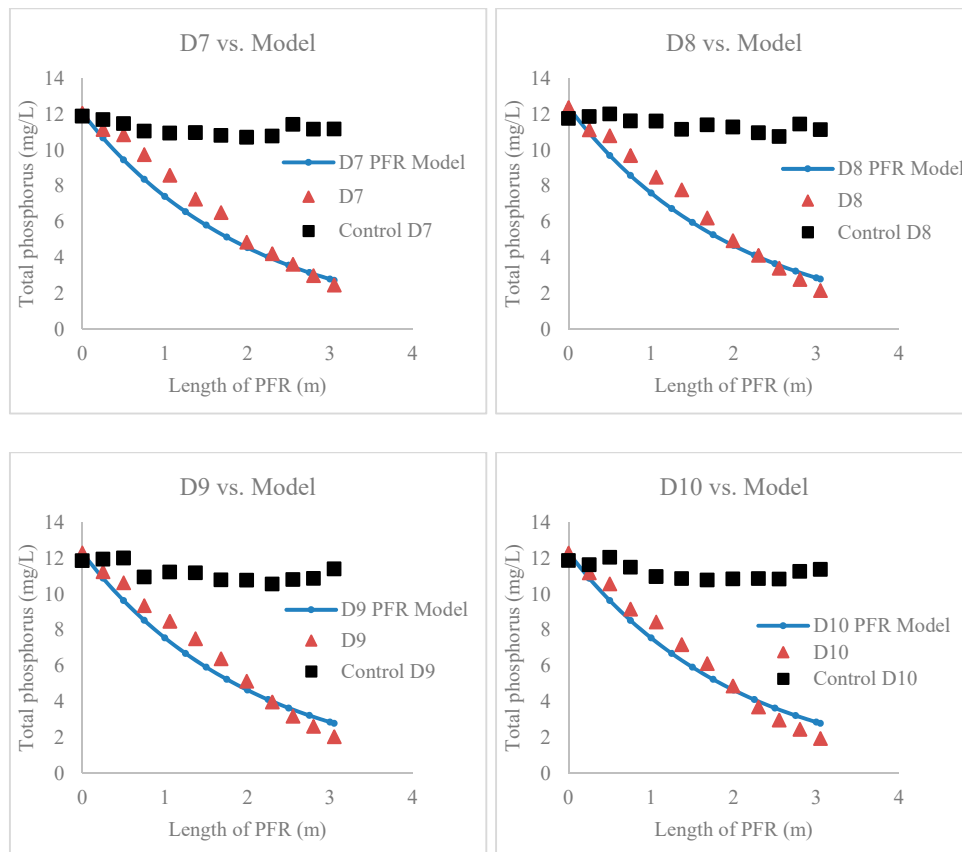

**Figure S2.** Removal of total phosphorus content according to predicted and experimental data from day 7 to 10.
